# Supplementary material
Source: PubMed Central journal article supplement (PMC7289116)
Supplement: mmc3.pdf [file mmc3.pdf]

## eTable 1. Search Strategy for Article Selection

### (A). EMBASE (n=86)

| # ▲ | Searches | Results                              | Type   |
|-----|----------|--------------------------------------|--------|
| 1   |          | SARS-CoV-2.mp.                       | 266    |
| 2   |          | COVID-19.mp.                         | 650    |
| 3   |          | 2019-nCoV.mp.                        | 319    |
| 4   |          | novel coronavirus.mp.                | 985    |
| 5   |          | coronavirus 2019.mp.                 | 188    |
| 6   |          | 2019 coronavirus.mp.                 | 20     |
| 7   |          | Wuhan coronavirus.mp.                | 8      |
| 8   |          | Wuhan pneumonia.mp.                  | 11     |
| 9   |          | 1 or 2 or 3 or 4 or 5 or 6 or 7 or 8 | 1550   |
| 10  |          | stool*.tw.                           | 66126  |
| 11  |          | feces*.tw.                           | 31501  |
| 12  |          | fecal*.tw.                           | 74398  |
| 13  |          | digestive*.tw.                       | 70339  |
| 14  |          | gastrointestinal*.tw.                | 322444 |
| 15  |          | specimens*.tw.                       | 385248 |
| 16  |          | 10 or 11 or 12 or 13 or 14 or 15     | 882416 |
| 17  |          | 9 and 16                             | 86     |

**(B). Medline (n=105)**

| # ▲ | Searches                             | Results |
|-----|--------------------------------------|---------|
| 1   | SARS-CoV-2.mp.                       | 362     |
| 2   | COVID-19.mp.                         | 1009    |
| 3   | 2019-nCoV.mp.                        | 342     |
| 4   | novel coronavirus.mp.                | 969     |
| 5   | coronavirus 2019.mp.                 | 189     |
| 6   | 2019 coronavirus.mp.                 | 25      |
| 7   | Wuhan coronavirus.mp.                | 10      |
| 8   | Wuhan pneumonia.mp.                  | 8       |
| 9   | 1 or 2 or 3 or 4 or 5 or 6 or 7 or 8 | 1870    |
| 10  | stool*.tw.                           | 43560   |
| 11  | feces*.tw.                           | 27398   |
| 12  | fecal*.tw.                           | 57090   |
| 13  | digestive*.tw.                       | 56442   |
| 14  | gastrointestinal*.tw.                | 228476  |
| 15  | specimens*.tw.                       | 307512  |
| 16  | 10 or 11 or 12 or 13 or 14 or 15     | 672173  |
| 17  | 9 and 16                             | 105     |

**(C). Scopus (n=150)**

TITLE-ABS-KEY ( "SARS-CoV-2" OR "COVID-19" OR "2019-nCoV" OR "novel coronavirus" OR "coronavirus 2019" OR "2019 coronavirus" OR "Wuhan coronavirus" OR "Wuhan pneumonia" ) AND ( "stool" OR "feces" OR "fecal" OR "digestive" OR "gastrointestinal" OR "specimens" )

**(D). China National Knowledge Infrastructure (CNKI; n=347)**

FT=("新型冠状病毒"+"新冠肺炎"+"新型冠状病毒肺炎"+"严重急性呼吸综合征冠状病毒 2"+"2019-nCov"+"2019 新型冠状病毒"+"2019 冠状病毒"+"corona virus disease-19"+"COVID-19"+"SARS-COV-2"+"novel coronavirus pneumonia"+"NCP")and FT=( "粪便" +"大便"+"排泄物"+"生物样本"+"临床标本")

**(E). WANFANG (n=72)**

(主题:(新型冠状病毒)+主题:(新冠肺炎)+主题:(新型冠状病毒肺炎)+主题:(严重急性呼吸综合征冠状病毒2)\*全部:(粪便)+主题:(新型冠状病毒)+主题:(新冠肺炎)+主题:(新型冠状病毒肺炎)+主题:(严重急性呼吸综合征冠状病毒2)\*(生物样本)+主题:(新型冠状病毒)+主题:(新冠肺炎)+主题:(新型冠状病毒肺炎)+主题:(严重急性呼吸综合征冠状病毒2)\*全部(大便)+主题:(新型冠状病毒)+主题:(新冠肺炎)+主题:(新型冠状病毒肺炎)+主题:(严重急性呼吸综合征冠状病毒2)\*全部:(排泄物)+主题:(新型冠状病毒)+主题:(新冠肺炎)+主题:(新型冠状病毒肺炎)+主题:(严重急性呼吸综合征冠状病毒2)\*全部:(临床样本))\*Date:2019-

**(F). VIP (n=2)**

U=(新型冠状病毒+新冠肺炎+新型冠状病毒肺炎+严重急性呼吸综合征冠状病毒  
2+2019-nCov+2019 新型冠状病毒+2019 冠状病毒+corona virus disease-19+COVID-  
19+SARS-COV-2+novel coronavirus pneumonia+NCP)and U=(粪便+大便+排泄物+生物  
样本+临床标本)
