# Supplementary material
Source: PubMed Central journal article supplement (PMC7289116)
Supplement: mmc5.pdf [file mmc5.pdf]

**eTable 3. Quality assessment of selected articles**

| Author      | Introduction |   |   |   | Methods |   |   |   |    | Results |    |    |    |    |    | Discussion |    |    | Other |    |
|-------------|--------------|---|---|---|---------|---|---|---|----|---------|----|----|----|----|----|------------|----|----|-------|----|
|             | 1            | 2 | 3 | 4 | 5       | 6 | 7 | 8 | 9  | 10      | 11 | 12 | 13 | 14 | 15 | 16         | 17 | 18 | 19    | 20 |
| Wang WL     | Y            | Y | N | Y | Y       | Y | Y | Y | NM | Y       | Y  | Y  | Y  | Y  | Y  | Y          | Y  | Y  | N     | Y  |
| Xiao F      | Y            | Y | N | Y | Y       | Y | Y | Y | Y  | N       | Y  | Y  | Y  | Y  | NM | Y          | Y  | N  | N     | Y  |
| Young BE    | Y            | Y | N | Y | Y       | Y | Y | Y | NM | Y       | Y  | Y  | Y  | Y  | Y  | Y          | Y  | Y  | N     | Y  |
| Cai JH      | Y            | Y | N | Y | Y       | Y | Y | Y | Y  | N       | Y  | Y  | Y  | Y  | NM | Y          | Y  | N  | N     | NM |
| Pan XF      | Y            | Y | N | Y | Y       | Y | Y | N | Y  | Y       | Y  | Y  | Y  | Y  | NM | Y          | NM | NM | N     | NM |
| Kujawski SA | Y            | Y | N | Y | Y       | Y | Y | Y | NM | N       | Y  | Y  | Y  | Y  | Y  | Y          | Y  | Y  | NM    | NM |
| Deng LS     | Y            | Y | N | Y | Y       | Y | Y | Y | Y  | Y       | Y  | Y  | Y  | Y  | NM | Y          | Y  | Y  | N     | Y  |
| Guan WJ     | Y            | Y | N | Y | Y       | Y | Y | N | Y  | Y       | Y  | Y  | Y  | Y  | Y  | Y          | Y  | Y  | N     | NM |
| Ling Y      | Y            | Y | N | Y | Y       | Y | Y | Y | Y  | Y       | Y  | Y  | Y  | Y  | NM | Y          | Y  | N  | NM    | NM |
| Xie CB      | Y            | Y | N | Y | Y       | Y | Y | Y | Y  | N       | Y  | Y  | Y  | Y  | NM | Y          | N  | N  | N     | Y  |
| Zhang JC    | Y            | Y | N | Y | Y       | Y | Y | Y | Y  | N       | Y  | Y  | Y  | Y  | Y  | Y          | Y  | N  | N     | NM |
| Shi SR      | Y            | Y | N | Y | Y       | Y | Y | Y | Y  | N       | Y  | Y  | Y  | Y  | NM | Y          | Y  | Y  | N     | NM |
| Chen Y      | Y            | Y | N | Y | Y       | Y | Y | Y | Y  | N       | Y  | Y  | Y  | Y  | NM | Y          | Y  | N  | NM    | NM |
| Wu BS       | Y            | Y | N | Y | Y       | Y | Y | Y | Y  | Y       | Y  | Y  | Y  | Y  | Y  | Y          | Y  | Y  | N     | NM |
| Tang A      | Y            | Y | N | Y | Y       | Y | Y | Y | Y  | N       | Y  | Y  | Y  | Y  | NM | Y          | Y  | N  | NM    | NM |
| Li BL       | Y            | Y | N | Y | Y       | Y | Y | N | Y  | N       | Y  | Y  | Y  | Y  | Y  | Y          | Y  | Y  | N     | NM |
| Zou JB      | Y            | Y | N | Y | Y       | Y | Y | N | Y  | N       | Y  | Y  | Y  | Y  | NM | Y          | Y  | N  | N     | NM |

Y, Yes; N, Not; NM, not mentioned.

According to quality of cross-sectional studies (AXIS) scale (Downes MJ, Brennan ML, Williams HC, Dean RS. Development of a critical appraisal tool to assess the quality of cross-sectional studies (AXIS). *BMJ open* 2016; **6**(12): e011458.):

#### *Introduction*

1. Were the aims/objectives of the study clear?

#### *Methods*

2. Was the study design appropriate for the stated aim(s)?
3. Was the sample size justified?
4. Was the target/reference population clearly defined? (Is it clear who the research was about?)
5. Was the sample frame taken from an appropriate population base so that it closely represented the target/reference population under investigation?
6. Was the selection process likely to select subjects/participants that were representative of the target/reference population under investigation?
7. Were measures undertaken to address and categorise non-responders?
8. Were the risk factor and outcome variables measured appropriate to the aims of the study?
9. Were the risk factor and outcome variables measured correctly using instruments/measurements that had been trialled, piloted or published previously?
10. Is it clear what was used to determine statistical significance and/or precision estimates? (eg, p values, CIs)
11. Were the methods (including statistical methods) sufficiently described to enable them to be repeated?

#### *Results*

12. Were the basic data adequately described?
13. Does the response rate raise concerns about non-response bias?
14. If appropriate, was information about non-responders described?
15. Were the results internally consistent?
16. Were the results for the analyses described in the methods, presented?

#### *Discussion*

17. Were the authors' discussions and conclusions justified by the results?
18. Were the limitations of the study discussed?

#### *Other*

19. Were there any funding sources or conflicts of interest that may affect the authors' interpretation of the results?
20. Was ethical approval or consent of participants attained?
