# Supplementary material
Source: PubMed Central journal article supplement (PMC7289116)

**eFigure 1.** Association between average number of samples tested per patient and positivity.

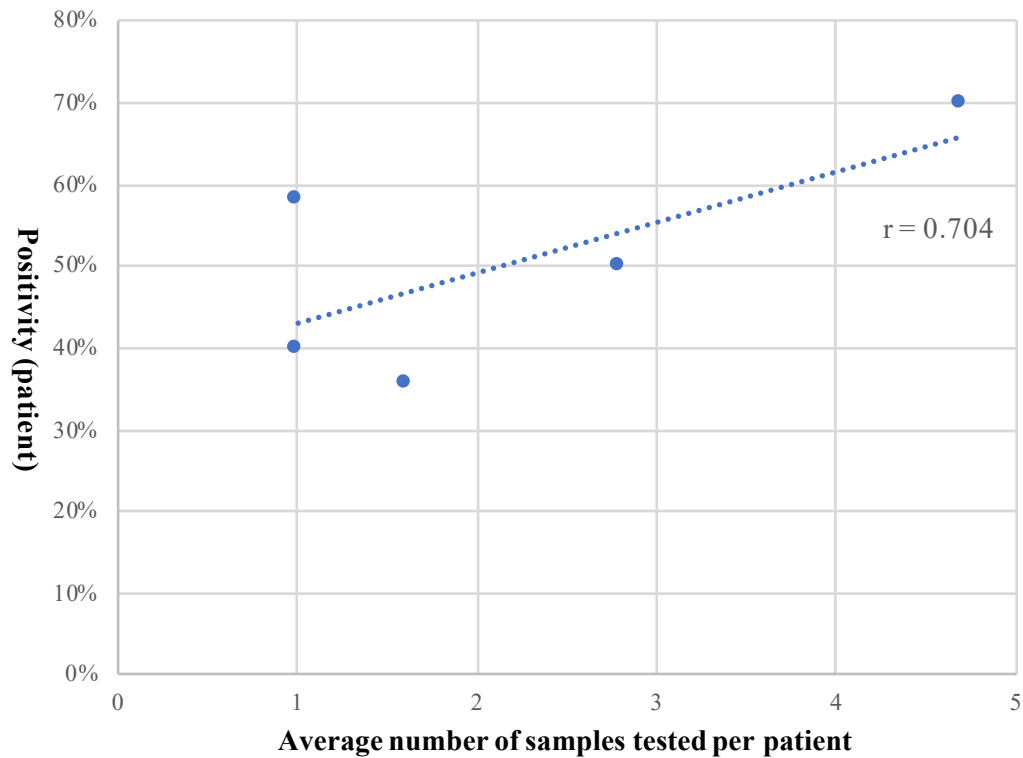

Supplement: mmc1.pdf [file mmc1.pdf]

**eFigure 2** Sensitivity analysis for study robustness and reliability

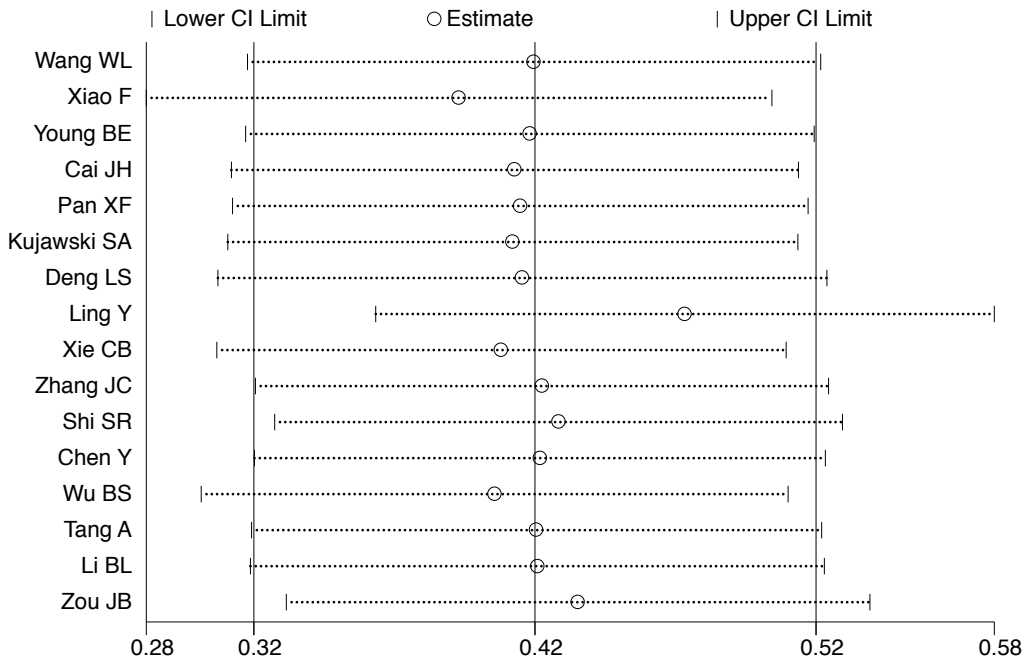

Supplement: mmc2.pdf [file mmc2.pdf]
